# Supplementary material for: Purification, Identification and Characterization of Antioxidant Peptides from Corn Silk Tryptic Hydrolysate: An Integrated In Vitro-In Silico Approach
Source: MDPI journal article supplement (doi:10.3390/antiox10111822), 2021-11-17
Supplement: s1 [file s1]

### Supplementary file

**Table S1:** Coordinates of box center and box size for molecular docking with different targets by using Webina 1.0.2, and the root mean square deviation (RMSD) values obtained.

| Targets            | Box Center |     |    | Box Size (Å) |    |    | RMSD Values |
|--------------------|------------|-----|----|--------------|----|----|-------------|
|                    | x          | y   | z  | x            | y  | z  |             |
| ABTS <sup>•+</sup> | 28         | 28  | 28 | 25           | 25 | 25 | -           |
| Keap1              | 38.56      | -19 | -5 | 22           | 23 | 22 | 0.51        |
| MPO                | -25        | -45 | 43 | 25           | 25 | 25 | 1.10        |
| XO                 | 29         | 21  | 15 | 25           | 25 | 25 | 1.81        |

ABTS<sup>•+</sup>, 2,2'-azino-bis(3-ethylbenzothiazoline-6-sulfonic acid) diammonium salt radical cation; Keap1, Kelch-like ECH-associated protein 1; MPO, myeloperoxidase; XO, xanthine oxidase.

**Table S2:** Binding affinities of 29 corn silk peptides docked onto Keap1, MPO and XO.

| SPE<br>Fractions | Peptides <sup>a</sup> | Binding Affinity (kcal/mol) <sup>b</sup> |             |             |
|------------------|-----------------------|------------------------------------------|-------------|-------------|
|                  |                       | Keap1                                    | MPO         | XO          |
| 0 mM KCl         | KRYFKR                | -7.8                                     | <b>-5.5</b> | -           |
|                  | PRVRVAGR              | -7.9                                     | -4.8        | -2.7        |
|                  | PVWAAKR               | -7.8                                     | <b>-6.2</b> | -1.0        |
|                  | QVASGPLQR             | <b>-8.1</b>                              | -5.3        | -2.0        |
|                  | MAPRTPRK              | -7.6                                     | -4.6        | -           |
|                  | NKVVKLMR              | -7.0                                     | -3.5        | -           |
|                  | KVPLAVFSR             | <b>-8.4</b>                              | -5.3        | -           |
|                  | LKKGSPDKR             | -7.3                                     | -3.2        | -           |
|                  | FQLKPVFR              | -7.8                                     | -4.0        | -           |
|                  | THAVKGVVHK            | -7.5                                     | -2.7        | -           |
|                  | YTWKFKGR              | <b>-8.4</b>                              | -4.6        | -           |
|                  | ARVPQQSYR             | -7.5                                     | -3.8        | -           |
|                  | VHFNKGKKR             | -7.0                                     | -3.6        | -           |
|                  | TAPLSSKALKR           | -7.0                                     | 0.6         | -           |
|                  | FSCPLVMKGPNGLR        | -6.3                                     | -           | -           |
| 20 mM KCl        | RHGSGR                | -7.9                                     | <b>-6.2</b> | -4.8        |
|                  | NMVPGR                | <b>-8.1</b>                              | <b>-6.6</b> | -3.7        |
|                  | FMFFVYK               | <b>-8.2</b>                              | -4.9        | -           |
|                  | MCFHHHFK              | -7.5                                     | -1.3        | -           |
| 200 mM KCl       | DFPGAK                | <b>-8.9</b>                              | <b>-6.9</b> | <b>-5.2</b> |
|                  | NDGPSR                | <b>-8.0</b>                              | <b>-6.3</b> | <b>-5.2</b> |
|                  | AGFPLGK               | <b>-8.4</b>                              | <b>-6.7</b> | -4.9        |
|                  | AMQQDK                | -7.6                                     | <b>-5.7</b> | -3.1        |
|                  | NLEGYR                | <b>-8.7</b>                              | <b>-6.5</b> | -3.4        |
|                  | YETLNR                | <b>-8.5</b>                              | <b>-6.5</b> | -5.0        |
|                  | MPPKSTR               | -7.8                                     | <b>-5.7</b> | -4.0        |
|                  | TAGASLVAR             | <b>-8.2</b>                              | <b>-5.5</b> | -2.9        |
|                  | SSPATGGSLR            | <b>-8.1</b>                              | -4.9        | -1.5        |
|                  | NANSLAGPQR            | <b>-8.2</b>                              | -3.6        | -           |

<sup>a</sup>Peptides are arranged in order of increasing molecular mass, as in Table 1. <sup>b</sup>Binding affinities in **bold** are the same as or more negative than those computed for DEQIPSHPPR (-8.0 kcal/mol), DTETGVPT (-5.5 kcal/mol) and ACECD (-5.2 kcal/mol), the reference peptides docked on Keap1, MPO and XO, respectively. - indicates positive values, which are not shown. Values presented are mean of four replicates.
